# Supplementary material for: A Simulation and Empirical Study of Differential Test Functioning (DTF)
Source: MDPI journal article supplement (doi:10.3390/psych5020032), 2023-06-05
Supplement: s1 [file s1]

# Supplementary Materials: A Simulation and Empirical Study of Differential Test Functioning (DTF)

Güler Yavuz Temel

**Table S1.** The item parameters used for data generation.

| Items | a     | d      |
|-------|-------|--------|
| 1     | 1.202 | -0.202 |
| 2     | 1.436 | 0.058  |
| 3     | 1.101 | -0.305 |
| 4     | 0.940 | 0.084  |
| 5     | 1.256 | -0.784 |
| 6     | 1.841 | -2.305 |
| 7     | 1.325 | 0.706  |
| 8     | 1.273 | 0.285  |
| 9     | 0.778 | -0.185 |
| 10    | 1.091 | -1.533 |
| 11    | 1.477 | 0.033  |
| 12    | 1.134 | -0.690 |
| 13    | 1.185 | -0.660 |
| 14    | 1.199 | 0.889  |
| 15    | 1.089 | 0.879  |
| 16    | 0.825 | 0.367  |
| 17    | 1.483 | -0.318 |
| 18    | 1.059 | -0.883 |
| 19    | 0.902 | -0.420 |
| 20    | 1.065 | 0.212  |

**Table S2.** Non-uniform DIF items in real data set (slope parameters only).

| Items | X2     | df    | p     | sig    | a1    | d      |
|-------|--------|-------|-------|--------|-------|--------|
| m2    | 4,125  | 1,000 | 0,042 | dif    | 0,725 | -0,933 |
| m3    | 9,419  | 1,000 | 0,002 | dif    | 0,562 | -0,954 |
| m28   | 13,930 | 1,000 | 0,000 | dif    | 1,180 | 1,624  |
| m32   | 5,065  | 1,000 | 0,024 | dif    | 0,688 | -0,569 |
| m33   | 6,579  | 1,000 | 0,010 | dif    | 0,633 | 0,885  |
| ma7   | 6,806  | 1,000 | 0,009 | dif    | 0,974 | 3,071  |
| ma8   | 4,363  | 1,000 | 0,037 | dif    | 0,840 | 1,195  |
| ma11  | 8,066  | 1,000 | 0,005 | dif    | 0,410 | 1,213  |
| ma12  | 7,808  | 1,000 | 0,005 | dif    | 0,507 | 1,231  |
| ma17  | 3,931  | 1,000 | 0,047 | dif    | 0,744 | -0,895 |
| m8    | 1,938  | 1,000 | 0,164 | no_dif | 1,743 | -2,298 |
| m30   | 0,498  | 1,000 | 0,480 | no_dif | 1,434 | -0,839 |
| m9    | 0,003  | 1,000 | 0,956 | no_dif | 1,429 | -1,478 |
| ma10  | 1,442  | 1,000 | 0,230 | no_dif | 1,354 | -0,149 |
| m27   | 0,977  | 1,000 | 0,323 | no_dif | 1,265 | -1,600 |
| m29   | 2,544  | 1,000 | 0,111 | no_dif | 1,240 | 0,115  |
| m10   | 0,735  | 1,000 | 0,391 | no_dif | 1,181 | 0,838  |
| m19   | 0,199  | 1,000 | 0,655 | no_dif | 1,139 | -0,749 |
| ma6   | 0,184  | 1,000 | 0,668 | no_dif | 1,108 | 2,059  |
| m14   | 0,158  | 1,000 | 0,691 | no_dif | 1,099 | 0,409  |

|      |       |       |       |        |       |        |
|------|-------|-------|-------|--------|-------|--------|
| ma4  | 2,939 | 1,000 | 0,086 | no_dif | 1,073 | 1,940  |
| m18  | 1,080 | 1,000 | 0,299 | no_dif | 1,062 | 0,139  |
| m11  | 0,356 | 1,000 | 0,551 | no_dif | 1,025 | -0,149 |
| m1   | 0,530 | 1,000 | 0,467 | no_dif | 1,004 | 0,639  |
| ma15 | 0,119 | 1,000 | 0,731 | no_dif | 1,000 | -0,678 |
| m4   | 1,187 | 1,000 | 0,276 | no_dif | 0,985 | -1,013 |
| ma14 | 0,001 | 1,000 | 0,979 | no_dif | 0,945 | -0,299 |
| ma16 | 0,483 | 1,000 | 0,487 | no_dif | 0,925 | 2,313  |
| ma1  | 1,960 | 1,000 | 0,162 | no_dif | 0,916 | 0,497  |
| m34  | 1,806 | 1,000 | 0,179 | no_dif | 0,904 | -0,191 |
| m7   | 0,576 | 1,000 | 0,448 | no_dif | 0,885 | -0,302 |
| m21  | 0,111 | 1,000 | 0,740 | no_dif | 0,876 | 0,290  |
| m35  | 2,671 | 1,000 | 0,102 | no_dif | 0,854 | -1,264 |
| m13  | 1,509 | 1,000 | 0,219 | no_dif | 0,821 | -1,079 |
| ma9  | 0,638 | 1,000 | 0,425 | no_dif | 0,808 | 0,677  |
| m20  | 0,010 | 1,000 | 0,919 | no_dif | 0,763 | 2,140  |
| m17  | 0,143 | 1,000 | 0,705 | no_dif | 0,739 | -0,106 |
| m15  | 0,000 | 1,000 | 0,985 | no_dif | 0,738 | -0,066 |
| m12  | 0,120 | 1,000 | 0,730 | no_dif | 0,729 | 0,408  |
| ma2  | 0,083 | 1,000 | 0,773 | no_dif | 0,688 | 0,199  |
| m25  | 0,032 | 1,000 | 0,857 | no_dif | 0,674 | 0,672  |
| ma3  | 0,169 | 1,000 | 0,681 | no_dif | 0,670 | 0,784  |
| m5   | 0,032 | 1,000 | 0,857 | no_dif | 0,667 | 1,274  |
| m6   | 2,121 | 1,000 | 0,145 | no_dif | 0,640 | 0,040  |
| ma5  | 0,315 | 1,000 | 0,574 | no_dif | 0,638 | 2,108  |
| m23  | 0,865 | 1,000 | 0,352 | no_dif | 0,536 | -0,695 |
| m24  | 0,431 | 1,000 | 0,512 | no_dif | 0,533 | -0,261 |
| m16  | 0,603 | 1,000 | 0,437 | no_dif | 0,524 | 1,099  |
| m26  | 2,814 | 1,000 | 0,093 | no_dif | 0,523 | -0,595 |
| m22  | 0,017 | 1,000 | 0,896 | no_dif | 0,431 | 0,616  |
| m31  | 1,564 | 1,000 | 0,211 | no_dif | 0,406 | -0,038 |
| ma13 | 0,173 | 1,000 | 0,678 | no_dif | 0,315 | 0,030  |

**Table S3.** Uniform DIF items in real data set (intercept parameters only).

| Items | X2     | df    | p     | sig    | a1    | d      |
|-------|--------|-------|-------|--------|-------|--------|
| m1    | 4,511  | 1,000 | 0,034 | dif    | 1,004 | 0,639  |
| m8    | 4,497  | 1,000 | 0,034 | dif    | 1,743 | -2,298 |
| m9    | 10,937 | 1,000 | 0,001 | dif    | 1,429 | -1,478 |
| m10   | 13,122 | 1,000 | 0,000 | dif    | 1,181 | 0,838  |
| m15   | 7,084  | 1,000 | 0,008 | dif    | 0,738 | -0,066 |
| m27   | 6,233  | 1,000 | 0,013 | dif    | 1,265 | -1,600 |
| m28   | 33,281 | 1,000 | 0,000 | dif    | 1,180 | 1,624  |
| m33   | 24,240 | 1,000 | 0,000 | dif    | 0,633 | 0,885  |
| m34   | 17,717 | 1,000 | 0,000 | dif    | 0,904 | -0,191 |
| ma4   | 5,438  | 1,000 | 0,020 | dif    | 1,073 | 1,940  |
| ma8   | 10,926 | 1,000 | 0,001 | dif    | 0,840 | 1,195  |
| ma9   | 4,435  | 1,000 | 0,035 | dif    | 0,808 | 0,677  |
| ma10  | 5,734  | 1,000 | 0,017 | dif    | 1,354 | -0,149 |
| ma11  | 5,703  | 1,000 | 0,017 | dif    | 0,410 | 1,213  |
| ma12  | 7,806  | 1,000 | 0,005 | dif    | 0,507 | 1,231  |
| ma13  | 5,084  | 1,000 | 0,024 | dif    | 0,315 | 0,030  |
| m30   | 0,010  | 1,000 | 0,919 | no_dif | 1,434 | -0,839 |

|      |       |       |       |        |       |        |
|------|-------|-------|-------|--------|-------|--------|
| m29  | 3,122 | 1,000 | 0,077 | no_dif | 1,240 | 0,115  |
| m19  | 0,077 | 1,000 | 0,782 | no_dif | 1,139 | -0,749 |
| ma6  | 0,158 | 1,000 | 0,691 | no_dif | 1,108 | 2,059  |
| m14  | 2,249 | 1,000 | 0,134 | no_dif | 1,099 | 0,409  |
| m18  | 1,019 | 1,000 | 0,313 | no_dif | 1,062 | 0,139  |
| m11  | 2,590 | 1,000 | 0,108 | no_dif | 1,025 | -0,149 |
| ma15 | 0,000 | 1,000 | 0,985 | no_dif | 1,000 | -0,678 |
| m4   | 2,248 | 1,000 | 0,134 | no_dif | 0,985 | -1,013 |
| ma7  | 2,000 | 1,000 | 0,157 | no_dif | 0,974 | 3,071  |
| ma14 | 0,177 | 1,000 | 0,674 | no_dif | 0,945 | -0,299 |
| ma16 | 1,867 | 1,000 | 0,172 | no_dif | 0,925 | 2,313  |
| ma1  | 0,201 | 1,000 | 0,654 | no_dif | 0,916 | 0,497  |
| m7   | 2,399 | 1,000 | 0,121 | no_dif | 0,885 | -0,302 |
| m21  | 0,722 | 1,000 | 0,395 | no_dif | 0,876 | 0,290  |
| m35  | 0,020 | 1,000 | 0,887 | no_dif | 0,854 | -1,264 |
| m13  | 0,973 | 1,000 | 0,324 | no_dif | 0,821 | -1,079 |
| m20  | 0,604 | 1,000 | 0,437 | no_dif | 0,763 | 2,140  |
| ma17 | 2,376 | 1,000 | 0,123 | no_dif | 0,744 | -0,895 |
| m17  | 0,398 | 1,000 | 0,528 | no_dif | 0,739 | -0,106 |
| m12  | 1,754 | 1,000 | 0,185 | no_dif | 0,729 | 0,408  |
| m2   | 3,598 | 1,000 | 0,058 | no_dif | 0,725 | -0,933 |
| m32  | 0,102 | 1,000 | 0,750 | no_dif | 0,688 | -0,569 |
| ma2  | 0,926 | 1,000 | 0,336 | no_dif | 0,688 | 0,199  |
| m25  | 0,221 | 1,000 | 0,638 | no_dif | 0,674 | 0,672  |
| ma3  | 0,268 | 1,000 | 0,605 | no_dif | 0,670 | 0,784  |
| m5   | 1,508 | 1,000 | 0,219 | no_dif | 0,667 | 1,274  |
| m6   | 0,816 | 1,000 | 0,366 | no_dif | 0,640 | 0,040  |
| ma5  | 0,155 | 1,000 | 0,694 | no_dif | 0,638 | 2,108  |
| m3   | 2,724 | 1,000 | 0,099 | no_dif | 0,562 | -0,954 |
| m23  | 1,596 | 1,000 | 0,206 | no_dif | 0,536 | -0,695 |
| m24  | 1,082 | 1,000 | 0,298 | no_dif | 0,533 | -0,261 |
| m16  | 0,370 | 1,000 | 0,543 | no_dif | 0,524 | 1,099  |
| m26  | 0,933 | 1,000 | 0,334 | no_dif | 0,523 | -0,595 |
| m22  | 0,548 | 1,000 | 0,459 | no_dif | 0,431 | 0,616  |
| m31  | 0,441 | 1,000 | 0,507 | no_dif | 0,406 | -0,038 |

**Table S4.** Non-uniform DIF items in real data set (both intercept and parameters).

| Items | X2     | df    | p     | sig | a1    | d      |
|-------|--------|-------|-------|-----|-------|--------|
| m2    | 8,228  | 2,000 | 0,016 | dif | 0,725 | -0,933 |
| m3    | 13,370 | 2,000 | 0,001 | dif | 0,562 | -0,954 |
| m9    | 12,065 | 2,000 | 0,002 | dif | 1,429 | -1,478 |
| m10   | 14,746 | 2,000 | 0,001 | dif | 1,181 | 0,838  |
| m15   | 7,680  | 2,000 | 0,021 | dif | 0,738 | -0,066 |
| m27   | 6,319  | 2,000 | 0,042 | dif | 1,265 | -1,600 |
| m28   | 33,285 | 2,000 | 0,000 | dif | 1,180 | 1,624  |
| m33   | 24,348 | 2,000 | 0,000 | dif | 0,633 | 0,885  |
| m34   | 17,824 | 2,000 | 0,000 | dif | 0,904 | -0,191 |
| ma7   | 7,563  | 2,000 | 0,023 | dif | 0,974 | 3,071  |
| ma8   | 10,997 | 2,000 | 0,004 | dif | 0,840 | 1,195  |
| ma9   | 8,290  | 2,000 | 0,016 | dif | 0,808 | 0,677  |
| ma10  | 6,189  | 2,000 | 0,045 | dif | 1,354 | -0,149 |
| ma11  | 9,457  | 2,000 | 0,009 | dif | 0,410 | 1,213  |

|             |               |              |              |            |              |              |
|-------------|---------------|--------------|--------------|------------|--------------|--------------|
| <b>ma12</b> | <b>10,375</b> | <b>2,000</b> | <b>0,006</b> | <b>dif</b> | <b>0,507</b> | <b>1,231</b> |
| <b>ma13</b> | <b>6,447</b>  | <b>2,000</b> | <b>0,040</b> | <b>dif</b> | <b>0,315</b> | <b>0,030</b> |
| m8          | 4,559         | 2,000        | 0,102        | no_dif     | 1,743        | -2,298       |
| m30         | 0,519         | 2,000        | 0,771        | no_dif     | 1,434        | -0,839       |
| m29         | 4,281         | 2,000        | 0,118        | no_dif     | 1,240        | 0,115        |
| m19         | 0,280         | 2,000        | 0,869        | no_dif     | 1,139        | -0,749       |
| ma6         | 1,142         | 2,000        | 0,565        | no_dif     | 1,108        | 2,059        |
| m14         | 2,309         | 2,000        | 0,315        | no_dif     | 1,099        | 0,409        |
| ma4         | 5,470         | 2,000        | 0,065        | no_dif     | 1,073        | 1,940        |
| m18         | 3,107         | 2,000        | 0,211        | no_dif     | 1,062        | 0,139        |
| m11         | 3,633         | 2,000        | 0,163        | no_dif     | 1,025        | -0,149       |
| m1          | 4,602         | 2,000        | 0,100        | no_dif     | 1,004        | 0,639        |
| ma15        | 0,120         | 2,000        | 0,942        | no_dif     | 1,000        | -0,678       |
| m4          | 3,335         | 2,000        | 0,189        | no_dif     | 0,985        | -1,013       |
| ma14        | 0,182         | 2,000        | 0,913        | no_dif     | 0,945        | -0,299       |
| ma16        | 1,975         | 2,000        | 0,372        | no_dif     | 0,925        | 2,313        |
| ma1         | 3,265         | 2,000        | 0,195        | no_dif     | 0,916        | 0,497        |
| m7          | 3,618         | 2,000        | 0,164        | no_dif     | 0,885        | -0,302       |
| m21         | 0,722         | 2,000        | 0,697        | no_dif     | 0,876        | 0,290        |
| m35         | 2,673         | 2,000        | 0,263        | no_dif     | 0,854        | -1,264       |
| m13         | 2,471         | 2,000        | 0,291        | no_dif     | 0,821        | -1,079       |
| m20         | 0,878         | 2,000        | 0,645        | no_dif     | 0,763        | 2,140        |
| ma17        | 5,869         | 2,000        | 0,053        | no_dif     | 0,744        | -0,895       |
| m17         | 0,723         | 2,000        | 0,697        | no_dif     | 0,739        | -0,106       |
| m12         | 1,791         | 2,000        | 0,408        | no_dif     | 0,729        | 0,408        |
| m32         | 5,065         | 2,000        | 0,079        | no_dif     | 0,688        | -0,569       |
| ma2         | 1,365         | 2,000        | 0,505        | no_dif     | 0,688        | 0,199        |
| m25         | 0,222         | 2,000        | 0,895        | no_dif     | 0,674        | 0,672        |
| ma3         | 0,803         | 2,000        | 0,669        | no_dif     | 0,670        | 0,784        |
| m5          | 2,494         | 2,000        | 0,287        | no_dif     | 0,667        | 1,274        |
| m6          | 4,176         | 2,000        | 0,124        | no_dif     | 0,640        | 0,040        |
| ma5         | 0,320         | 2,000        | 0,852        | no_dif     | 0,638        | 2,108        |
| m23         | 2,142         | 2,000        | 0,343        | no_dif     | 0,536        | -0,695       |
| m24         | 1,250         | 2,000        | 0,535        | no_dif     | 0,533        | -0,261       |
| m16         | 1,839         | 2,000        | 0,399        | no_dif     | 0,524        | 1,099        |
| m26         | 3,269         | 2,000        | 0,195        | no_dif     | 0,523        | -0,595       |
| m22         | 0,581         | 2,000        | 0,748        | no_dif     | 0,431        | 0,616        |
| m31         | 2,735         | 2,000        | 0,255        | no_dif     | 0,406        | -0,038       |
